# Supplementary material
Source: MDPI journal article supplement (https://www.mdpi.com/2078-2489/13/2/44)
Supplement: s1 [file s1]

## Supplementary Material

# Sellers eligibility by Amazon's algorithm: An empirical study based on classification algorithms and decision rules

Álvaro Gómez-Losada<sup>1,2</sup>, Gualberto Asencio-Cortés<sup>3</sup>, Néstor Duch-Brown<sup>1</sup>

<sup>1</sup> European Commission, Joint Research Centre (JRC), Seville, Spain.

<sup>2</sup> Department of Statistics and Operations Research, University of Seville, Seville, Spain.

<sup>3</sup> Data Science & Big Data Lab, Universidad Pablo de Olavide, ES-41013 Seville, Spain.

---

## Contents

- SM.1. Most relevant rules when predicting the change of seller at the Buy-Box.
- SM.2. Most relevant rules when predicting the seller at the Buy-Box.

### SM.1. Most relevant rules when predicting the change of seller at the Buy-Box.

Table S1. Analyzed rules at category of products. Coverage: Similarly to a leaf,  $n$  is the number of cases covered by the rule and  $m$ , if it appears, shows how many of them do not belong to the class predicted by the rule. The rule's accuracy is estimated by the Laplace ratio  $(n - m + 1) / (n + 2)$ . The lift is the result of dividing the rule's estimated accuracy by the relative frequency of the predicted class in the data set. P or PP: specific rule for a product (or products). The identification of product(s) is (are) omitted by privacy concerns.

| Category            | Rule | Coverage ( $n/m$ ) | Lift | Accuracy | Features and values                                                                         |
|---------------------|------|--------------------|------|----------|---------------------------------------------------------------------------------------------|
| Automotive          | 1    | 69/4               | 10.3 | 0.930    | PP, $rPrice > 0$ , $rPriceCumMax > 13.82$                                                   |
|                     | 2    | 24/1               | 10.2 | 0.923    | $stock \leq 0$ , $rPrice \leq -0.05$                                                        |
| Baby                | 1    | 12                 | 26.6 | 0.929    | $opinions > 1247$ , $rPrice > 6.22$                                                         |
|                     | 2    | 10                 | 26.3 | 0.917    | $stock \leq 0$ , $rPrice \leq -2.7$ , $rPriceCumMin > -46.22$                               |
| Beauty              | 1    | 43/3               | 7.0  | 0.911    | P, $bestseller > 0$ , $rPrice \leq -0.02$                                                   |
|                     | 2    | 9                  | 7.0  | 0.909    | P, $opinions \leq 145$ , $rPrice \leq -0.02$                                                |
| Electronics         | 1    | 69                 | 3.3  | 0.986    | P, $opinions > 625$ , $opinions \leq 634$                                                   |
|                     | 2    | 85/2               | 3.2  | 0.966    | $amChoice > 0$ , $rPrice > 13.98$ , $rPriceCumMax > 31.11$                                  |
| Garden              | 1    | 24                 | 9.0  | 0.962    | $stock \leq 0$ , $rPrice \leq -4.08$                                                        |
|                     | 2    | 30/3               | 8.2  | 0.875    | $rank > 15$ , $rPrice \leq -4.08$                                                           |
| Grocery             | 1    | 15                 | 20.6 | 0.941    | $rPrice > 6.53$                                                                             |
|                     | 2    | 5                  | 18.8 | 0.857    | $rPrice > -1.08$ , $rPrice \leq -0.04$                                                      |
| Hpc                 | 1    | 15                 | 5.2  | 0.941    | PP, $fulfilled \leq 0$ , $rPrice \leq -0.02$                                                |
|                     | 2    | 9                  | 5.0  | 0.909    | PP, $amChoice < 0$ , $rPrice \leq -0.02$ , $rPriceCumMax \leq 4.01$                         |
| Industrial          | 1    | 50/5               | 4.9  | 0.885    | $rPrice \leq -2.29$ , $rPriceCumMin \leq -8.96$                                             |
|                     | 2    | 65/14              | 4.3  | 0.776    | $rPrice > 2.93$                                                                             |
| Jewelry             | 1    | 14                 | 13.3 | 0.938    | $stock \leq 0$ , $rPrice > -49.95$ , $rPrice \leq -0.04$                                    |
|                     | 2    | 9/1                | 11.6 | 0.818    | $stock \leq 0$ , $rPrice \leq -0.04$                                                        |
| Kitchen             | 1    | 34/1               | 10.4 | 0.944    | $prodRating \leq 4.8$ , $rPrice > 16.62$                                                    |
|                     | 2    | 42/2               | 10.3 | 0.932    | $amChoice < 0$ , $rPrice > 6.67$ , $rPriceCumMin > 13.1$                                    |
| Lightning           | 1    | 14                 | 8.1  | 0.938    | $rPrice \leq -21.13$                                                                        |
|                     | 2    | 11                 | 8.0  | 0.923    | $rPrice > 31.86$                                                                            |
| Luggage             | 1    | 48/7               | 11.8 | 0.840    | $rPrice \leq -9.09$                                                                         |
|                     | 2    | 44/9               | 11.0 | 0.783    | $rPrice > 12.02$                                                                            |
| Musical instruments | 1    | 243/29             | 3.3  | 0.878    | PP, $rPriceCumMin > -47.66$ , $rPriceCumMin \leq 14.31$                                     |
|                     | 2    | 40/5               | 3.2  | 0.857    | $opinions \leq 537$ , $rPrice > 2.4$ , $rPriceCumMin > -27.88$                              |
| Office              | 1    | 12/1               | 20.6 | 0.857    | $amChoice \leq 0$ , $rPrice \leq -4.03$ ,                                                   |
|                     | 2    | 22/4               | 19.0 | 0.792    | $stock \leq 0$ , $rPrice \leq -0.26$                                                        |
| PC                  | 1    | 18                 | 4.5  | 0.950    | P, $rPrice \leq -0.01$ , $rPriceCumMin \leq -7.12$                                          |
|                     | 2    | 17                 | 4.5  | 0.947    | P, $rank \leq 14$ , $rPrice \leq -2.13$                                                     |
| Pet supplies        | 1    | 9                  | 11.8 | 0.909    | $rPrice \leq -0.03$ , $rPriceCumMin > -0.24$                                                |
|                     | 2    | 226/56             | 9.7  | 0.750    | $rPrice \leq 0$                                                                             |
| Software            | 1    | 58/1               | 8.3  | 0.967    | P, $prodRating > 3.7$ , $rPriceCumMin \leq -39.82$                                          |
|                     | 2    | 43/1               | 8.2  | 0.956    | P, $prodRating > 3.7$ , $fulfilled > 0.956$ , $rPrice > -0.03$ , $rPriceCumMin \leq -11.48$ |
| Sports              | 1    | 24                 | 3.9  | 0.962    | $stock \leq 0$ , $rPrice \leq -0.03$ , $rPriceCumMin > -18.05$                              |
|                     | 2    | 11                 | 3.7  | 0.923    | $opinions > 844$ , $rank \leq 16$                                                           |
| Tools               | 1    | 151/27             | 4.8  | 0.817    | $opinions > 455$ , $opinions \leq 474$ , $rPrice \leq -0.25$ , $rPriceCumMin > -2.06$       |
|                     | 2    | 111/22             | 4.7  | 0.796    | PP, $rPrice > 0$                                                                            |
| Toys                | 1    | 59                 | 6.1  | 0.984    | $fulfilled \leq 0$ , $rPrice \leq -18.34$                                                   |
|                     | 2    | 43                 | 6.1  | 0.978    | $opinions < 81$ , $stock > 0$ , $rPrice \leq -18.34$                                        |
| Videogames          | 1    | 7                  | 7.1  | 0.889    | P, $opinions \leq 839$ , $rPrice > 0$ , $rPriceCumMin > 15.47$                              |
|                     | 2    | 6                  | 7.0  | 0.875    | P, $bestseller \leq 0$ , $rPrice \leq -0.02$ , $rPriceCumMin \leq -2.74$                    |
| Watches             | 1    | 63/1               | 4.5  | 0.969    | $rPrice > 57.32$                                                                            |
|                     | 2    | 26                 | 4.4  | 0.964    | P, $rPrice \leq -0.01$ , $rPriceCumMax \leq 0.45$                                           |

## SM.2. Most relevant rules when predicting the seller at the Buy-Box.

Table S2. Analyzed rules at category of products. Coverage: Similarly to a leaf,  $n$  is the number of cases covered by the rule and  $m$ , if it appears, shows how many of them do not belong to the class predicted by the rule. The rule's accuracy is estimated by the Laplace ratio  $(n - m + 1) / (n + 2)$ . The lift is the result of dividing the rule's estimated accuracy by the relative frequency of the predicted class in the data set. P or PP: specific rule for a product (or products). The identification of product(s) is (are) omitted by privacy concerns.

| Category            | Rule | Coverage ( $n/m$ ) | Lift    | Accuracy | Features and values                                                                              |
|---------------------|------|--------------------|---------|----------|--------------------------------------------------------------------------------------------------|
| Automotive          | 1    | 2                  | 1216.9  | 0.750    | P, $stock \leq 0$                                                                                |
|                     | 2    | 2                  | 1216.9  | 0.750    | P, $fulfilled \leq 0$                                                                            |
| Baby                | 1    | 3                  | 465.9   | 0.800    | $opinions > 0, fulfilled > 0, stock \leq 0$                                                      |
|                     | 2    | 3                  | 436.8   | 0.750    | $opinions \leq 2334, fulfilled \leq 0, stock \leq 0$<br>$rPrice \leq 13.98, rPriceCumMax > 15.4$ |
| Beauty              | 1    | 2/1                | 2553    | 0.500    | P, $fulfilled \leq 0$                                                                            |
|                     | 2    | 3/2                | 2026.4  | 0.400    | P, $prodRating > 4.4, fulfilled > 0$<br>$rPriceCumMax > 12.0$                                    |
| Electronics         | 1    | 1                  | 9373.3  | 0.667    | P, $fulfilled \leq 0$ ,<br>$rPrice > -0.65, rPriceCumMax \leq 8.71$                              |
|                     | 2    | 2                  | 5272.5  | 0.750    | P, $fulfilled > 0$                                                                               |
| Garden              | 1    | 2                  | 482.2   | 0.750    | $opinions > 215, fulfilled \leq 0$                                                               |
|                     | 2    | 3                  | 342.9   | 0.800    | P, $fulfilled > 0$                                                                               |
| Grocery             | 1    | 2                  | 451.9   | 0.750    | $prodRating \leq 4.1, opinions \leq 205, fulfilled \leq 0$                                       |
|                     | 2    | 4                  | 251.0   | 0.833    | P, $fulfilled \leq 0, stock \leq 0$                                                              |
| Hpc                 | 1    | 2/1                | 2614.5  | 0.500    | P, $rPrice > 0.69$                                                                               |
|                     | 2    | 2/1                | 2614.5  | 0.500    | P, $prodrating \leq 4.4, bestseller \leq 0$ ,<br>$rPriceCumMin \leq -8.07$                       |
| Industrial          | 1    | 2                  | 572.2   | 0.750    | P                                                                                                |
|                     | 2    | 3                  | 406.9   | 0.800    | P, $fulfilled \leq 0$                                                                            |
| Jewelry             | 1    | 2                  | 724.9   | 0.750    | $prodRating > 4.6, opinions > 18, fulfilled \leq 0$                                              |
|                     | 2    | 2                  | 724.9   | 0.750    | P, $opinions \leq 18, fulfilled \leq 0$                                                          |
| Kitchen             | 1    | 1                  | 1764.0  | 0.667    | P                                                                                                |
|                     | 2    | 2                  | 992.2   | 0.750    | P, $opinions \leq 209, fulfilled > 0$                                                            |
| Lightining          | 1    | 2                  | 883.1   | 0.75     | P, $opinions \leq 225, fulfilled \leq 0$                                                         |
|                     | 2    | 2                  | 992.2   | 0.750    | P, $opinions > 36$                                                                               |
| Luggage             | 1    | 3                  | 555.2   | 0.800    | P, $fulfilled \leq 0, rank \leq 20$                                                              |
|                     | 2    | 3                  | 555.2   | 0.800    | P, $opinions \leq 127, fulfilled \leq 0$                                                         |
| Musical instruments | 1    | 1                  | 1904.7  | 0.667    | P                                                                                                |
|                     | 2    | 2                  | 1071.4  | 0.750    | P, $fulfilled \leq 0$                                                                            |
| Office              | 1    | 2                  | 640.5   | 0.750    | $opinions \leq 403, fulfilled \leq 0, stock \leq 20$                                             |
|                     | 2    | 2                  | 640.5   | 0.750    | $opinions > 403, fulfilled \leq 0, rank \leq 34, stock > 0$                                      |
| PC                  | 1    | 1                  | 14766.0 | 0.667    | P, $fulfilled \leq 0$                                                                            |
|                     | 2    | 2                  | 8305.9  | 0.750    | P, $fulfilled \leq 0$                                                                            |
| Pet supplies        | 1    | 2                  | 2000.3  | 0.75     | P, $fulfilled \leq 0, stock > 0$                                                                 |
|                     | 2    | 3                  | 1422.4  | 0.800    | P, $fulfilled \leq 0, stock \leq 0$                                                              |
| Software            | 1    | 1                  | 3698.7  | 0.667    | P                                                                                                |
|                     | 2    | 2                  | 2080.5  | 0.750    | P, $opinions \leq 33, fulfilled \leq 0$                                                          |
| Sports              | 1    | 1                  | 928.0   | 0.667    | P, $fulfilled > 0$                                                                               |
|                     | 2    | 2                  | 348.0   | 0.750    | P, $prodRating > 4.4, 35 < rank \leq 37$                                                         |
| Tools               | 1    | 3/2                | 984.4   | 0.400    | $opinions \leq 3, fulfilled \leq 0, rPriceCumMax \leq 23.46$                                     |
|                     | 2    | 3/2                | 984.4   | 0.750    | P, $opinions > 466, rPrice \leq -9.95$                                                           |
| Toys                | 1    | 1                  | 4205.3  | 0.667    | P                                                                                                |
|                     | 2    | 1                  | 4205.3  | 0.667    | P, $fulfilled > 0$                                                                               |
| Videogames          | 1    | 1                  | 7798.0  | 0.667    | P, $fulfilled \leq 0$                                                                            |
|                     | 2    | 1                  | 4386.4  | 0.750    | P, $fulfilled \leq 0$                                                                            |
| Watches             | 1    | 2                  | 4379.2  | 0.750    | P, $fulfilled \leq 0, stock \leq 0$                                                              |
|                     | 2    | 2                  | 2919.5  | 0.750    | $fulfilled \leq 0, bestseller > 1, stock \leq 0, rPriceCumMin > -22.58$                          |
